# Supplementary material for: Identification of Gene–Allele System Conferring Alkali-Tolerance at Seedling Stage in Northeast China Soybean Germplasm
Source: MDPI journal article supplement (doi:10.3390/ijms25052963), 2024-03-04
Supplement: s1 [file s1]

## Supplementary figures and tables

### Supplementary Figures

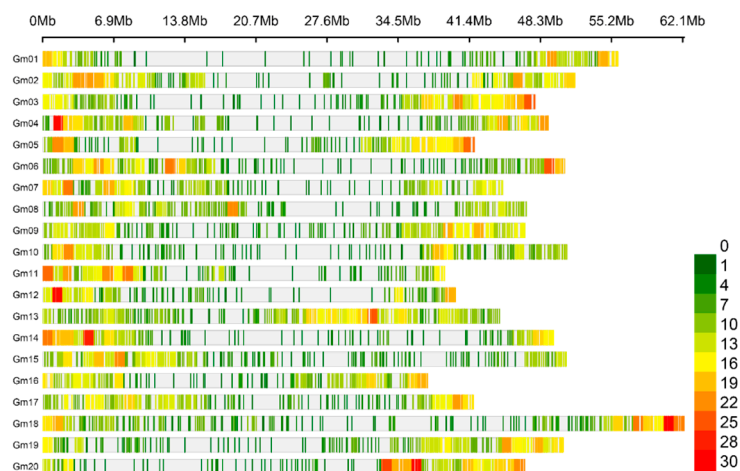

**Figure S1** The distribution of GASMs on chromosomes in the NECSGP

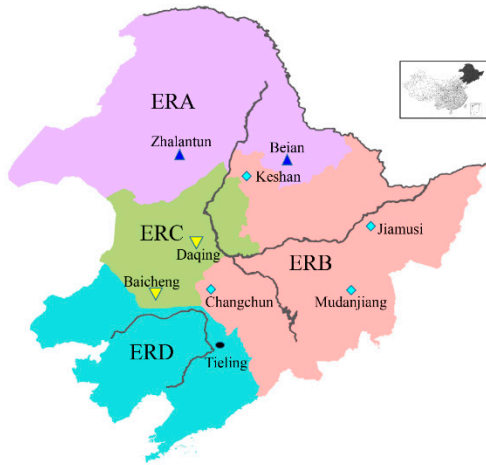

**Figure S2** Schematic map of four ecological ecoregions in Northeast China

Note: ERA: Eco-region of Heilongjiang valleys, including northern part of Inner Mongolia, the purple area in the picture, represented by Beian and Zhalantun; ERB: Eco-region of Songhuajiang valleys, pink area, represented by Keshan, Jiamusi, Mudanjiang, and Changchun; ERC: Eco-region of Nenjiang valleys, grass green area, represented by Baicheng and Daqing; ERD: Eco-region of Liaohe valleys, light blue area, represented by Tieling. The dissemination path of soybeans in Northeast China was from ERD to ERB, then from ERB to ERA and ERC. The upper right corner shows the location of the Northeast region in China.

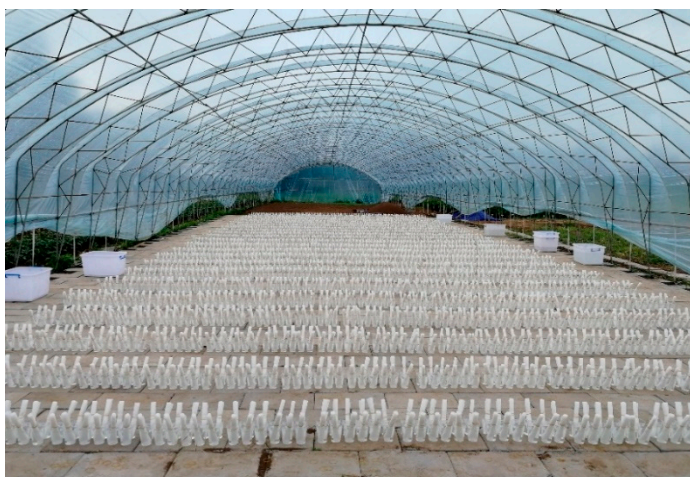

**Figure S3** The test site for alkali-tolerance at seedling stage for the NECSGP

Note: The paper roll hydroponics was used to grow seedlings. A pair of stress and non-stress (control) cups were placed together. The stress treatment was a mixed solution based on 1/2 Hoagland's nutrient solution added with  $\text{NaHCO}_3$ :  $\text{Na}_2\text{CO}_3$  (9:1) into a concentration of 220 mM with pH=9.8 while the control used 1/2 Hoagland's nutrient solution only.

## Supplementary Tables

**Table S1** Source and maturity groups of the tested 361 varieties in NECSGP

| Maturity group | HLJ | JL | LN | IM | Foreign | Total |
|----------------|-----|----|----|----|---------|-------|
| 000            | 14  |    |    | 2  |         | 16    |
| 00             | 40  |    |    | 5  |         | 45    |
| 0              | 136 | 10 | 1  | 5  | 5       | 157   |
| I              | 47  | 30 | 1  | 1  |         | 79    |
| II             | 5   | 34 | 4  |    |         | 43    |
| III            | 1   | 6  | 14 |    |         | 21    |
| Total          | 243 | 80 | 20 | 13 | 5       | 361   |

Note: HLJ, Heilongjiang province; JL, Jilin province; LN, Liaoning province; IM, Inner Mongolia autonomous region.

**Table S2** ANOVA of ATI under three environments of the NECSGP

| Source of variation           |     | <i>DF</i> | <i>MS</i> | <i>F</i> value | <i>P</i> value |
|-------------------------------|-----|-----------|-----------|----------------|----------------|
| Environment                   |     | 2         | 0.0052    | 5.96           | 0.0026         |
| Replication (Environment)     |     | 6         | 0.0018    | 2.08           | 0.0053         |
| Genotype                      | ERA | 60        | 0.0611    | 96.01          | <0.0001        |
|                               | ERB | 229       | 0.0854    | 57.64          | <0.0001        |
|                               | ERC | 7         | 0.1995    | 283.74         | <0.0001        |
|                               | ERD | 61        | 0.1072    | 138.92         | <0.0001        |
|                               | All | 360       | 0.0875    | 101.29         | <0.0001        |
| Genotype $\times$ Environment |     | 720       | 0.0015    | 1.70           | <0.0001        |
| Error                         |     | 2,148     | 0.0009    |                |                |
| Total                         |     | 3,236     |           |                |                |

**Table S3** Allele structure of 10 top alkali-tolerant and 10 top alkali-sensitive varieties

| Type      | Code | Variety               | Ecoregion | ATI  | Positive allele |             | Negative allele |             |
|-----------|------|-----------------------|-----------|------|-----------------|-------------|-----------------|-------------|
|           |      |                       |           |      | No.             | Mean-effect | No.             | Mean-effect |
| Tolerant  | F284 | Mufeng No. 3          | ERB       | 0.86 | 69              | 1.88        | 63              | -1.72       |
|           | F14  | Beidou 14             | ERB       | 0.86 | 71              | 1.76        | 61              | -1.71       |
|           | F58  | Mengdou 19            | ERA       | 0.86 | 69              | 1.84        | 63              | -1.70       |
|           | F337 | Jilin 20              | ERD       | 0.85 | 68              | 1.78        | 64              | -1.64       |
|           | F243 | Kenjian 35            | ERB       | 0.85 | 66              | 1.77        | 66              | -1.70       |
|           | F155 | Mufeng No. 1          | ERB       | 0.85 | 68              | 1.92        | 64              | -1.60       |
|           | F81  | Amsoy                 | ERB       | 0.84 | 71              | 1.82        | 61              | -1.68       |
|           | F116 | Kenfeng No. 10        | ERB       | 0.84 | 76              | 1.90        | 56              | -1.58       |
|           | F353 | Dongnong No. 4        | ERB       | 0.83 | 65              | 1.74        | 67              | -1.67       |
|           | F154 | Hefeng 22             | ERB       | 0.83 | 71              | 1.88        | 61              | -1.67       |
| Average   |      | 10                    |           | 0.85 | 69.4            | 1.83        | 62.6            | -1.69       |
| Sensitive | F124 | Kenfeng 23            | ERB       | 0.36 | 63              | 1.62        | 70              | -1.92       |
|           | P183 | Kangxian No. 7        | ERC       | 0.37 | 61              | 1.59        | 71              | -1.89       |
|           | F381 | Tonghua Pingdingxiang | ERD       | 0.39 | 67              | 1.56        | 65              | -1.74       |
|           | F334 | Xiaojinhuang No. 9    | ERD       | 0.41 | 66              | 1.66        | 66              | -1.79       |
|           | F61  | Mengdou 30            | ERB       | 0.42 | 59              | 1.59        | 73              | -1.94       |
|           | F45  | Hefeng 35             | ERB       | 0.44 | 70              | 1.57        | 62              | -1.77       |
|           | F110 | Changnong 20          | ERB       | 0.45 | 63              | 1.67        | 69              | -1.94       |
|           | F34  | Changnong No. 5       | ERD       | 0.45 | 63              | 1.69        | 69              | -1.80       |
|           | F95  | Jiyu 72               | ERD       | 0.45 | 64              | 1.61        | 68              | -1.85       |
|           | F136 | Nenfeng 18            | ERB       | 0.45 | 65              | 1.58        | 67              | -1.75       |
| Average   |      | 10                    |           | 0.42 | 64.1            | 1.62        | 68.0            | -1.84       |

Note: Ecoregion: Ecoregion in Northeast China; The dissemination path of soybeans in Northeast China was from ERD to ERB, then from ERB to ERA and ERC.

**Table S4.** The functional classifications of ATI genes identified in NECSP.

| Gene code        | Gene name            | Main-effect $R^2$ (%) | Biological process description                                   | Gene function classification | Reported gene                 |
|------------------|----------------------|-----------------------|------------------------------------------------------------------|------------------------------|-------------------------------|
| <i>gATI.1.1</i>  | <i>Glyma01g02580</i> | 1.32                  | amino acid transport;                                            | Material transport(II)       |                               |
| <i>gATI.1.2</i>  | <i>Glyma01g04515</i> | 0.09                  | biological process                                               | Biological process(VI)       |                               |
| <i>gATI.1.3</i>  | <i>Glyma01g22861</i> | 0.19                  | NA                                                               | Unknown(VIII)                |                               |
| <i>gATI.1.4</i>  | <i>Glyma01g30320</i> | 0.28                  | RNA processing;                                                  | Metabolic process (IV)       |                               |
| <i>gATI.1.5</i>  | <i>Glyma01g36070</i> | 1.69                  | removal of superoxide radicals                                   | Defense response(I)          |                               |
| <i>gATI.2.1</i>  | <i>Glyma02g00280</i> | 0.05                  | NA                                                               | Unknown(VIII)                |                               |
| <i>gATI.2.2</i>  | <i>Glyma02g05640</i> | 0.08                  | transmembrane receptor protein tyrosine kinase signaling pathway | Development(VII)             |                               |
| <i>gATI.2.3</i>  | <i>Glyma02g06730</i> | 3.48                  | organ development                                                | Development(VII)             |                               |
| <i>gATI.2.4</i>  | <i>Glyma02g08790</i> | 0.03                  | multicellular organismal development                             | Development(VII)             |                               |
| <i>gATI.2.5</i>  | <i>Glyma02g09130</i> | 0.70                  | NA                                                               | Unknown(VIII)                |                               |
| <i>gATI.2.6</i>  | <i>Glyma02g09240</i> | 0.41                  | protein ubiquitination                                           | Metabolic process (IV)       |                               |
| <i>gATI.2.7</i>  | <i>Glyma02g11151</i> | 0.78                  | protein phosphorylation                                          | Metabolic process (IV)       |                               |
| <i>gATI.2.8</i>  | <i>Glyma02g11335</i> | 1.28                  | cell-cell signaling                                              | Regulation of related (III)  |                               |
| <i>gATI.2.9</i>  | <i>Glyma02g14175</i> | 0.12                  | spermine biosynthetic process                                    | Biosynthetic process(V)      |                               |
| <i>gATI.2.10</i> | <i>Glyma02g15470</i> | 0.28                  | NA                                                               | Unknown(VIII)                |                               |
| <i>gATI.2.11</i> | <i>Glyma02g16850</i> | 0.39                  | biological process                                               | Biological process(VI)       |                               |
| <i>gATI.2.12</i> | <i>Glyma02g37010</i> | 0.05                  | NA                                                               | Unknown(VIII)                |                               |
| <i>gATI.2.13</i> | <i>Glyma02g38673</i> | 0.19                  | NA                                                               | Unknown(VIII)                |                               |
| <i>gATI.2.14</i> | <i>Glyma02g40220</i> | 0.06                  | biological process                                               | Biological process(VI)       |                               |
| <i>gATI.2.15</i> | <i>Glyma02g44350</i> | 0.24                  | acetyl-CoA metabolic process                                     | Metabolic process (IV)       |                               |
| <i>gATI.3.1</i>  | <i>Glyma03g07890</i> | 0.74                  | vacuole organization                                             | Defense response(I)          |                               |
| <i>gATI.3.2</i>  | <i>Glyma03g27770</i> | 2.23                  | oxidation-reduction process                                      | Biological process(VI)       |                               |
| <i>gATI.3.3</i>  | <i>Glyma03g30270</i> | 2.14                  | biological process                                               | Metabolic process (IV)       | <i>Glyma03g31691</i> (1.34Mb) |
| <i>gATI.3.4</i>  | <i>Glyma03g36720</i> |                       | hydrogen peroxide catabolic process                              | Defense response(I)          |                               |
| <i>gATI.3.5</i>  | <i>Glyma03g37221</i> | 0.33                  | response to molecule of fungATI origin                           | Biological process(VI)       |                               |
| <i>gATI.4.1</i>  | <i>Glyma04g10720</i> | 2.00                  | biological process                                               | Biosynthetic process(V)      |                               |
| <i>gATI.4.2</i>  | <i>Glyma04g43300</i> | 2.88                  | phosphatidylinositol biosynthetic process                        | Metabolic process (IV)       |                               |
| <i>gATI.5.1</i>  | <i>Glyma05g19630</i> | 0.02                  | protein phosphorylation                                          | Metabolic process (IV)       |                               |
| <i>gATI.5.2</i>  | <i>Glyma05g24760</i> | 0.09                  | N-terminal protein myristoylation                                | Defense response(I)          |                               |
| <i>gATI.5.3</i>  | <i>Glyma05g27300</i> | 0.94                  | defense response signaling pathway                               | Metabolic process (IV)       | <i>GsGST14</i> (2.13Mb)       |
| <i>gATI.5.4</i>  | <i>Glyma05g27690</i> | 0.2                   | SRP-dependent cotranslational protein targeting to membrane      | Metabolic process (IV)       | <i>GsGST14</i> (1.76Mb)       |
| <i>gATI.5.5</i>  | <i>Glyma05g32890</i> | 0.81                  | protein phosphorylation                                          | Metabolic process (IV)       |                               |
| <i>gATI.6.1</i>  | <i>Glyma06g01490</i> | 0.49                  | protein phosphorylation                                          | Defense response(I)          |                               |
| <i>gATI.6.2</i>  | <i>Glyma06g05300</i> | 1.82                  | response to oxidative stress                                     | Regulation of related (III)  |                               |
| <i>gATI.6.3</i>  | <i>Glyma06g07980</i> | 4.66                  | positive regulation of transcription                             | Regulation of related (III)  |                               |
| <i>gATI.6.4</i>  | <i>Glyma06g17410</i> | 0.08                  | RNA processing                                                   | Metabolic process (IV)       |                               |
| <i>gATI.6.5</i>  | <i>Glyma06g19756</i> | 0.20                  | lipid metabolic process                                          | Metabolic process (IV)       | <i>GsBOR2</i> (579.6kb)       |
| <i>gATI.6.6</i>  | <i>Glyma06g47010</i> | 0.14                  | NA                                                               | Unknown(VIII)                |                               |
| <i>gATI.7.1</i>  | <i>Glyma07g00400</i> | 0.73                  | acetyl-CoA metabolic process                                     | Metabolic process (IV)       |                               |
| <i>gATI.7.2</i>  | <i>Glyma07g05620</i> | 2.45                  | DNA catabolic process                                            | Metabolic process (IV)       |                               |
| <i>gATI.7.3</i>  | <i>Glyma07g06640</i> | 0.10                  | lipid metabolic process                                          | Biological process(VI)       |                               |
| <i>gATI.7.4</i>  | <i>Glyma07g07360</i> | 0.12                  | biological process                                               | Biological process(VI)       |                               |
| <i>gATI.7.5</i>  | <i>Glyma07g08290</i> |                       | NA                                                               | Unknown(VIII)                |                               |
| <i>gATI.7.6</i>  | <i>Glyma07g10280</i> | 0.08                  | biological process                                               | Metabolic process (IV)       |                               |
| <i>gATI.7.7</i>  | <i>Glyma07g14234</i> | 0.06                  | metabolic process                                                | Biosynthetic process(V)      |                               |
| <i>gATI.7.8</i>  | <i>Glyma07g31130</i> | 1.48                  | hydrogen peroxide biosynthetic process                           | Biological process(VI)       |                               |
| <i>gATI.7.9</i>  | <i>Glyma07g37810</i> | 0.16                  | biological process                                               | Defense response(I)          |                               |
| <i>gATI.7.10</i> | <i>Glyma07g38180</i> | 2.9                   | response to wounding                                             | Biological process(VI)       |                               |
| <i>gATI.8.1</i>  | <i>Glyma08g04620</i> | 0.18                  | protein dephosphorylation                                        | Biological process(VI)       |                               |
| <i>gATI.8.2</i>  | <i>Glyma08g10001</i> | 0.02                  | biological process                                               | Biological process(VI)       |                               |
| <i>gATI.8.3</i>  | <i>Glyma08g18320</i> | 0.38                  | biological process                                               | Defense response(I)          | <i>GsMIOX1a</i> (2.41Mb)      |
| <i>gATI.8.4</i>  | <i>Glyma08g42810</i> | 0.05                  | biological process                                               | Biological process(VI)       |                               |
| <i>gATI.8.5</i>  | <i>Glyma08g45301</i> | 0.65                  | NA                                                               | Unknown(VIII)                |                               |
| <i>gATI.8.6</i>  | <i>Glyma08g45501</i> | 0.13                  | NA                                                               | Unknown(VIII)                |                               |
| <i>gATI.8.7</i>  | <i>Glyma08g45610</i> | 0.72                  | response to salt stress                                          | Defense response(I)          |                               |
| <i>gATI.9.1</i>  | <i>Glyma09g12180</i> | 0.03                  | biological process                                               | Biological process(VI)       |                               |
| <i>gATI.9.2</i>  | <i>Glyma09g15860</i> | 0.03                  | biological process                                               | Biological process(VI)       |                               |
| <i>gATI.9.3</i>  | <i>Glyma09g33220</i> | 2.52                  | transmembrane transport                                          | Material transport(II)       |                               |
| <i>gATI.9.4</i>  | <i>Glyma09g40690</i> | 0.68                  | metabolic process                                                | Metabolic process (IV)       |                               |
| <i>gATI.9.5</i>  | <i>Glyma09g41821</i> | 0.38                  | mRNA splicing, via spliceosome                                   | Biological process(VI)       |                               |
| <i>gATI.10.1</i> | <i>Glyma10g06480</i> | 0.08                  | NA                                                               | Unknown(VIII)                |                               |
| <i>gATI.10.2</i> | <i>Glyma10g06600</i> | 0.80                  | defense response                                                 | Defense response(I)          |                               |
| <i>gATI.10.3</i> | <i>Glyma10g07601</i> | 1.32                  | DNA methylation                                                  | Biological process(VI)       |                               |
| <i>gATI.10.4</i> | <i>Glyma10g14620</i> | 0.06                  | NA                                                               | Unknown(VIII)                |                               |
| <i>gATI.10.5</i> | <i>Glyma10g30100</i> | 0.75                  | intra-Golgi vesicle-mediated transport                           | Material transport(II)       |                               |
| <i>gATI.10.6</i> | <i>Glyma10g30320</i> | 0.27                  | regulation of transcription, DNA-dependent                       | Biological process(VI)       |                               |
| <i>gATI.10.7</i> | <i>Glyma10g31560</i> | 1.32                  | ubiquitin-dependent protein catabolic process                    | Metabolic process (IV)       |                               |

|                   |                      |       |                                                 |                             |                           |
|-------------------|----------------------|-------|-------------------------------------------------|-----------------------------|---------------------------|
| <i>gATI.10.8</i>  | <i>Glyma10g37420</i> | 0.56  | NA                                              | Unknown(VIII)               | <i>GsSLAH3</i> (573.5kb)  |
| <i>gATI.11.1</i>  | <i>Glyma11g01253</i> | 0.05  | response to osmotic stress                      | Defense response(I)         |                           |
| <i>gATI.11.2</i>  | <i>Glyma11g03580</i> | 0.11  | biological process                              | Biological process(VI)      |                           |
| <i>gATI.11.3</i>  | <i>Glyma11g07830</i> | 0.71  | signal transduction                             | Regulation of related (III) | <i>Gshdz4</i> (287.7kb)   |
| <i>gATI.11.4</i>  | <i>Glyma11g15140</i> | 0.01  | regulation of transcription,                    | Regulation of related (III) |                           |
| <i>gATI.11.5</i>  | <i>Glyma11g27510</i> | 0.10  | regulation of transcription                     | Regulation of related (III) |                           |
| <i>gATI.12.1</i>  | <i>Glyma12g03180</i> | 0.10  | DNA mediated transformation                     | Metabolic process (IV)      |                           |
| <i>gATI.12.2</i>  | <i>Glyma12g08010</i> | 0.26  | fatty acid biosynthetic process                 | Biosynthetic process(V)     |                           |
| <i>gATI.12.3</i>  | <i>Glyma12g30080</i> | 0.24  | salicylic acid biosynthetic process             | Biosynthetic process(V)     |                           |
| <i>gATI.13.1</i>  | <i>Glyma13g00490</i> | 0.38  | biological process                              | Biological process(VI)      |                           |
| <i>gATI.13.2</i>  | <i>Glyma13g01900</i> | 0.04  | biological process                              | Biological process(VI)      |                           |
| <i>gATI.13.3</i>  | <i>Glyma13g23910</i> | 0.64  | histone acetylation                             | Regulation of related (III) |                           |
| <i>gATI.13.4</i>  | <i>Glyma13g29225</i> | 0.12  | NA                                              | Unknown(VIII)               |                           |
| <i>gATI.13.5</i>  | <i>Glyma13g29360</i> | 0.45  | biological process                              | Biological process(VI)      |                           |
| <i>gATI.13.6</i>  | <i>Glyma13g29520</i> | 0.04  | hyperosmotic salinity response                  | Defense response(I)         | <i>GsNAC019</i> (5.09Mb)  |
| <i>gATI.13.7</i>  | <i>Glyma13g40690</i> | 1.03  | exocytosis                                      | Defense response(I)         | <i>GsNAC019</i> (3.68Mb)  |
| <i>gATI.13.8</i>  | <i>Glyma13g42650</i> | 0.24  | NA                                              | Unknown(VIII)               |                           |
| <i>gATI.14.1</i>  | <i>Glyma14g04260</i> | 0.14  | hyperosmotic response                           | Defense response(I)         |                           |
| <i>gATI.14.2</i>  | <i>Glyma14g10780</i> | 0.98  | biological process                              | Biological process(VI)      |                           |
| <i>gATI.14.3</i>  | <i>Glyma14g20110</i> | 0.31  | endoplasmic reticulum unfolded protein response | Biological process(VI)      |                           |
| <i>gATI.14.4</i>  | <i>Glyma14g36130</i> | 0.25  | biological process                              | Biological process(VI)      |                           |
| <i>gATI.14.5</i>  | <i>Glyma14g37280</i> | 2.84  | biological process;                             | Development(VII)            |                           |
| <i>gATI.14.6</i>  | <i>Glyma14g38720</i> | 0.05  | photorespiration                                | Metabolic process (IV)      |                           |
| <i>gATI.15.1</i>  | <i>Glyma15g02310</i> | 0.35  | NA                                              | Unknown(VIII)               |                           |
| <i>gATI.15.2</i>  | <i>Glyma15g04006</i> | 0.32  | transcription, DNA-dependent                    | Regulation of related (III) |                           |
| <i>gATI.15.3</i>  | <i>Glyma15g07590</i> | 0.33  | embryo sac development                          | Regulation of related (III) |                           |
| <i>gATI.15.4</i>  | <i>Glyma15g16830</i> | 0.03  | stomatal complex morphogenesis                  | Biological process(VI)      |                           |
| <i>gATI.15.5</i>  | <i>Glyma15g19900</i> |       | response to salt stress                         | Defense response(I)         | <i>GsTIFY10a</i> (49.1kb) |
| <i>gATI.15.6</i>  | <i>Glyma15g27480</i> | 0.36  | trehalose biosynthetic process                  | Biosynthetic process(V)     |                           |
| <i>gATI.15.7</i>  | <i>Glyma15g27750</i> | 0.37  | biological process                              | Biological process(VI)      |                           |
| <i>gATI.15.8</i>  | <i>Glyma15g32540</i> |       | translation                                     | Regulation of related (III) |                           |
| <i>gATI.16.1</i>  | <i>Glyma16g08960</i> | 1.43  | fatty acid beta-oxidation                       | Metabolic process (IV)      |                           |
| <i>gATI.16.2</i>  | <i>Glyma16g28270</i> | 0.91  | regulation of transcription                     | Regulation of related (III) |                           |
| <i>gATI.16.3</i>  | <i>Glyma16g32650</i> | 0.89  | phloem or xylem histogenesis                    | Development(VII)            |                           |
| <i>gATI.16.4</i>  | <i>Glyma16g33831</i> | 0.1   | biological process                              | Biological process(VI)      |                           |
| <i>gATI.17.1</i>  | <i>Glyma17g07120</i> | 1.66  | toxin catabolic process                         | Metabolic process (IV)      | <i>GsCHX19.3</i> (1.95Mb) |
| <i>gATI.17.2</i>  | <i>Glyma17g08230</i> | 0.95  | cellular component organization                 | Development(VII)            |                           |
| <i>gATI.17.3</i>  | <i>Glyma17g10650</i> | 0.39  | biological process                              | Biological process(VI)      |                           |
| <i>gATI.17.4</i>  | <i>Glyma17g15720</i> | 0.03  | response to reactive oxygen species             | Defense response(I)         |                           |
| <i>gATI.17.5</i>  | <i>Glyma17g16831</i> | 0.11  | response to salt stress                         | Defense response(I)         |                           |
| <i>gATI.17.6</i>  | <i>Glyma17g33020</i> | 0.09  | cell plate assembly                             | Development(VII)            |                           |
| <i>gATI.17.7</i>  | <i>Glyma17g33930</i> | 2.56  | actin cytoskeleton organization                 | Development(VII)            |                           |
| <i>gATI.17.8</i>  | <i>Glyma17g36130</i> | 1.46  | lipid metabolic process;                        | Metabolic process (IV)      |                           |
| <i>gATI.18.1</i>  | <i>Glyma18g01490</i> | 2.71  | hyperosmotic salinity response                  | Defense response(I)         | <i>GsMIPS2</i> (814.6kb)  |
| <i>gATI.18.2</i>  | <i>Glyma18g03930</i> |       | hyperosmotic salinity response                  | Defense response(I)         | <i>GsMIPS2</i> (1.10Mb)   |
| <i>gATI.18.3</i>  | <i>Glyma18g03975</i> | 0.68  | NA                                              | Unknown(VIII)               |                           |
| <i>gATI.18.4</i>  | <i>Glyma18g04870</i> | 0.35  | biological process                              | Biological process(VI)      |                           |
| <i>gATI.18.5</i>  | <i>Glyma18g11512</i> | 0.15  | NA                                              | Unknown(VIII)               |                           |
| <i>gATI.18.6</i>  | <i>Glyma18g15001</i> | 0.03  | NA                                              | Unknown(VIII)               |                           |
| <i>gATI.18.7</i>  | <i>Glyma18g16761</i> | 0.27  | proteolysis                                     | Metabolic process (IV)      |                           |
| <i>gATI.18.8</i>  | <i>Glyma18g16780</i> | 0.71  | defense response                                | Defense response(I)         |                           |
| <i>gATI.18.9</i>  | <i>Glyma18g28130</i> | 3.00  | carbohydrate metabolic process                  | Metabolic process (IV)      |                           |
| <i>gATI.18.10</i> | <i>Glyma18g40780</i> | 1.71  | cysteine biosynthetic process                   | Biosynthetic process(V)     |                           |
| <i>gATI.18.11</i> | <i>Glyma18g46101</i> | 2.62  | defense response                                | Defense response(I)         |                           |
| <i>gATI.18.12</i> | <i>Glyma18g49450</i> | 0.12  | NA                                              | Unknown(VIII)               |                           |
| <i>gATI.18.13</i> | <i>Glyma18g50670</i> | 0.17  | response to salt stress                         | Defense response(I)         |                           |
| <i>gATI.18.14</i> | <i>Glyma18g53285</i> | 2.06  | biological process                              | Biological process(VI)      |                           |
| <i>gATI.19.1</i>  | <i>Glyma19g31900</i> | 1.28  | response to chitin                              | Defense response(I)         |                           |
| <i>gATI.19.2</i>  | <i>Glyma19g35820</i> | 0.78  | biological process                              | Biological process(VI)      |                           |
| <i>gATI.19.3</i>  | <i>Glyma19g42710</i> |       | transport; transmembrane transport              | Material transport(II)      |                           |
| <i>gATI.19.4</i>  | <i>Glyma19g43880</i> | 0.06  | defense response                                | Defense response(I)         |                           |
| <i>gATI.20.1</i>  | <i>Glyma20g01460</i> | 0.22  | response to salt stress                         | Defense response(I)         |                           |
| <i>gATI.20.2</i>  | <i>Glyma20g24740</i> | 0.95  | Mo-molybdopterin cofactor biosynthetic process  | Biosynthetic process(V)     |                           |
| <i>gATI.20.3</i>  | <i>Glyma20g30360</i> | 0.97  | NA                                              | Unknown(VIII)               |                           |
| <i>gATI.20.4</i>  | <i>Glyma20g30870</i> | 0.17  | histone methylation                             | Biological process(VI)      |                           |
| Total             | 132                  | 90.94 |                                                 |                             | 10                        |

Note: Gene code: such as *gATI.1.1* where ATI means alkali tolerance, .1 represents Chromosome 1 and .1 represents its order on the chromosome according to its physical position. The position corresponds to the Williams 82 reference genome version 1 (Wm82.a1).

$R^2$ : genetic contribution of a Gene.

Reported genes: the identified genes in this study are consistent to previously reported genes in SoyBase (<http://www.soybase.org>).



**Table S5** Newly emerged/introduced positive ATI alleles in ERB of NECSP

| Order | Allele code         | Gene                 | Allele effect | Main-effect<br>$R^2$ (%) | In accessions<br>and crosses | Gene ontology                          |
|-------|---------------------|----------------------|---------------|--------------------------|------------------------------|----------------------------------------|
| 1     | <i>gATI.2.5.a3</i>  | <i>Glyma02g09130</i> | 0.007         | 0.70                     | ✓                            | Unknown (VIII)                         |
| 2     | <i>gATI.2.6.a3</i>  | <i>Glyma02g09240</i> | 0.022         | 0.41                     | NA                           | Protein ubiquitination(III)            |
| 3     | <i>gATI.2.8.a4*</i> | <i>Glyma02g11335</i> | 0.085         | 1.28                     | NA                           | Cell-cell signaling(I)                 |
| 4     | <i>gATI.2.11.a3</i> | <i>Glyma02g16850</i> | 0.026         | 0.39                     | ✓                            | Biological process(VI)                 |
| 5     | <i>gATI.4.1.a2*</i> | <i>Glyma03g07890</i> | 0.042         | 2.00                     | ✓                            | Biological process(VI)                 |
| 6     | <i>gATI.5.1.a2</i>  | <i>Glyma05g19630</i> | 0.010         | 0.02                     | ✓                            | Protein phosphorylation(III)           |
| 7     | <i>gATI.7.7.a2*</i> | <i>Glyma07g14234</i> | 0.074         | 0.06                     | ✓                            | Metabolic process(IV)                  |
| 8     | <i>gATI.8.2.a3</i>  | <i>Glyma08g10001</i> | 0.027         | 0.02                     | NA                           | Biological process(VI)                 |
| 9     | <i>gATI.10.8.a2</i> | <i>Glyma10g37420</i> | 0.045         | 0.56                     | NA                           | Unknown (VIII)                         |
| 10    | <i>gATI.11.3.a2</i> | <i>Glyma11g07830</i> | 0.079         | 0.71                     | ✓                            | Signal transduction(I)                 |
| 11    | <i>gATI.11.5.a2</i> | <i>Glyma11g27510</i> | 0.001         | 0.10                     | ✓                            | Regulation of transcription(III)       |
| 12    | <i>gATI.12.3.a2</i> | <i>Glyma12g30080</i> | 0.009         | 0.24                     | ✓                            | Salicylic acid biosynthetic process(V) |
| 13    | <i>gATI.13.1.a2</i> | <i>Glyma13g00490</i> | 0.016         | 0.38                     | ✓                            | Biological process(VI)                 |
| 14    | <i>gATI.14.2.a4</i> | <i>Glyma14g10780</i> | 0.010         | 0.98                     | NA                           | Biological process(VI)                 |
| 15    | <i>gATI.14.2.a7</i> | <i>Glyma14g10780</i> | 0.016         | 0.98                     | NA                           | Biological process(VI)                 |
| 16    | <i>gATI.14.4.a2</i> | <i>Glyma14g36130</i> | 0.034         | 0.25                     | ✓                            | Biological process(VI)                 |
| 17    | <i>gATI.15.5.a2</i> | <i>Glyma15g19900</i> | 0.004         | (0.03)                   | ✓                            | Response to salt stress(I)             |
| 18    | <i>gATI.17.5.a3</i> | <i>Glyma17g16831</i> | 0.013         | 0.11                     | NA                           | Response to salt stress(I)             |
| 19    | <i>gATI.19.2.a2</i> | <i>Glyma19g35820</i> | 0.051         | 0.78                     | ✓                            | Biological process(VI)                 |
| 20    | <i>gATI.20.3.a2</i> | <i>Glyma20g30360</i> | 0.068         | 0.97                     | ✓                            | Unknown (VIII)                         |
|       |                     |                      | 0.004-0.085   | 0.002-2.00               | 13                           |                                        |

Note: In accessions and crosses: genes existed in the top ten accessions and top ten predicted crosses.

\* nominated important alleles. In  $R^2$  column, the digit in parentheses is the  $R^2$  of G×E.
